# Supplementary material for: Recent changes in the reporting of STIs in Japan during the COVID-19 pandemic
Source: HighWire-hosted journal article supplement (doi:10.1136/sextrans-2021-055378), 2022-04-22
Supplement: sextrans-2021-055378supp001_data_supplement.pdf [file sextrans-2021-055378supp001_data_supplement.pdf]

1 **Ghaznavi et al. Recent Changes in the Reporting of Sexually Transmitted Infections in**  
 2 **Japan during the COVID-19 pandemic**

3  
 4  
 5 **Online Supplementary Material.**

6  
 7  
 8  
 9 **Table of Contents**

10

| Table/Figure | Title                                                                                                                                                                                                   | Page  |
|--------------|---------------------------------------------------------------------------------------------------------------------------------------------------------------------------------------------------------|-------|
| eTable 1     | State of emergency declarations, by prefecture.                                                                                                                                                         | 2-3   |
| NA           | Supplemental Methods                                                                                                                                                                                    | 4-9   |
| eTable 2     | Case definitions and reporting criteria for STI per National Institute of Infectious Disease guidelines.                                                                                                | 10-11 |
| NA           | Results: Sensitivity Analyses                                                                                                                                                                           | 12    |
| eTable 3     | Dates corresponding to week numbers, 2020-2021.                                                                                                                                                         | 13    |
| eTable 4     | Observed and expected number of genital chlamydia diagnoses per sentinel institution with 95% prediction intervals, 2018-2021.                                                                          | 14-15 |
| eTable 5     | Observed and expected number of gonorrhoea diagnoses per sentinel institution with 95% prediction intervals, 2018-2021.                                                                                 | 16-17 |
| eTable 6     | Observed and expected number of condyloma acuminata diagnoses per sentinel institution with 95% prediction intervals, 2018-2021.                                                                        | 18-19 |
| eTable 7     | Observed and expected number of herpes diagnoses per sentinel institution with 95% prediction intervals, 2018-2021.                                                                                     | 20-21 |
| eTable 8     | Observed and expected number of HIV/AIDS diagnoses with 95% prediction intervals, 2018-2021.                                                                                                            | 22-24 |
| eTable 9     | Observed and expected number of syphilis diagnoses with 95% prediction intervals, 2018-2021.                                                                                                            | 25-27 |
| eFigure 1    | Observed and expected number of chlamydia, gonorrhoea, condyloma, and herpes diagnoses per sentinel institution with 95% prediction intervals, 2018-2021, women only. Parameters: $b = 5$ and $w = 1$ . | 28    |
| eFigure 2    | Observed and expected number of chlamydia, gonorrhoea, condyloma, and herpes diagnoses per sentinel institution with 95% prediction intervals, 2018-2021, men only. Parameters: $b = 5$ and $w = 1$ .   | 29    |
| eFigure 3    | Observed and expected number of HIV/AIDS diagnoses with 95% prediction intervals, 2018-2021, stratified by sex of sexual partners. Parameters: $b = 5$ and $w = 3$ .                                    | 30    |
| eFigure 4    | Observed and expected number of syphilis diagnoses with 95% prediction intervals, 2018-2021, stratified by stage at diagnosis. Parameters: $b = 5$ and $w = 3$ .                                        | 31    |
| NA           | References                                                                                                                                                                                              | 32    |

11

12 **eTable 1.** State of emergency declarations, by prefecture.  
13

| Prefecture | State of Emergency #1    | State of Emergency #2    | State of Emergency #3    | State of Emergency #4    |
|------------|--------------------------|--------------------------|--------------------------|--------------------------|
| Hokkaido   | 4/16/2020 –<br>5/25/2020 | 5/16/2021 –<br>6/20/2021 | 8/27/2021 –<br>9/30/2021 |                          |
| Aomori     | 4/16/2020 –<br>5/14/2020 |                          |                          |                          |
| Iwate      | 4/16/2020 –<br>5/14/2020 |                          |                          |                          |
| Miyagi     | 4/16/2020 –<br>5/14/2020 | 8/27/2021 –<br>9/12/2021 |                          |                          |
| Akita      | 4/16/2020 –<br>5/14/2020 |                          |                          |                          |
| Yamagata   | 4/16/2020 –<br>5/14/2020 |                          |                          |                          |
| Fukushima  | 4/16/2020 –<br>5/14/2020 |                          |                          |                          |
| Ibaraki    | 4/16/2020 –<br>5/14/2020 | 8/20/2021 –<br>9/30/2021 |                          |                          |
| Tochigi    | 4/16/2020 –<br>5/14/2020 | 1/14/2021 –<br>2/7/2021  | 8/20/2021 –<br>9/30/2021 |                          |
| Gunma      | 4/16/2020 –<br>5/14/2020 | 8/20/2021 –<br>9/30/2021 |                          |                          |
| Saitama    | 4/7/2020 –<br>5/25/2020  | 1/8/2021 –<br>3/21/2021  | 8/2/2021 –<br>9/30/2021  |                          |
| Chiba      | 4/7/2020 –<br>5/25/2020  | 1/8/2021 –<br>3/21/2021  | 8/2/2021 –<br>9/30/2021  |                          |
| Tokyo      | 4/7/2020 –<br>5/25/2020  | 1/8/2021 –<br>3/21/2021  | 4/25/2021 –<br>6/20/2021 | 7/12/2021 –<br>9/30/2021 |
| Kanagawa   | 4/7/2020 –<br>5/25/2020  | 1/8/2021 –<br>3/21/2021  | 8/2/2021 –<br>9/30/2021  |                          |
| Niigata    | None                     |                          |                          |                          |
| Toyama     | 4/16/2020 –<br>5/14/2020 |                          |                          |                          |
| Ishikawa   | 4/16/2020 –<br>5/14/2020 |                          |                          |                          |
| Fukui      | 4/16/2020 –<br>5/14/2020 |                          |                          |                          |
| Yamanashi  | 4/16/2020 –<br>5/14/2020 |                          |                          |                          |
| Nagano     | 4/16/2020 –<br>5/14/2020 |                          |                          |                          |
| Gifu       | 4/16/2020 –<br>5/14/2020 | 1/14/2021 –<br>2/28/2021 | 8/27/2021 –<br>9/30/2021 |                          |
| Shizuoka   | 4/16/2020 –<br>5/14/2020 | 8/20/2021 –<br>9/30/2021 |                          |                          |
| Aichi      | 4/16/2020 –<br>5/14/2020 | 1/14/2021 –<br>2/28/2021 | 5/12/2021 –<br>6/20/2021 | 8/27/2021 –<br>9/30/2021 |
| Mie        | 4/16/2020 –<br>5/14/2020 | 8/27/2021 –<br>9/30/2021 |                          |                          |
| Shiga      | 4/16/2020 –<br>5/14/2020 | 8/27/2021 –<br>9/30/2021 |                          |                          |
| Kyoto      | 4/16/2020 –              | 1/14/2021 –              | 4/25/2021 –              | 8/20/2021 –              |

|           |                          |                          |                          |                          |
|-----------|--------------------------|--------------------------|--------------------------|--------------------------|
|           | 5/21/2020                | 2/28/2021                | 6/20/2021                | 9/30/2021                |
| Osaka     | 4/7/2020 –<br>5/21/2020  | 1/14/2021 –<br>2/28/2021 | 4/25/2021 –<br>6/20/2021 | 8/20/2021 –<br>9/30/2021 |
| Hyogo     | 4/7/2020 –<br>5/21/2020  | 1/14/2021 –<br>2/28/2021 | 4/25/2021 –<br>6/20/2021 | 8/20/2021 –<br>9/30/2021 |
| Nara      | 4/16/2020 –<br>5/14/2020 |                          |                          |                          |
| Wakayama  | 4/16/2020 –<br>5/14/2020 |                          |                          |                          |
| Tottori   | 4/16/2020 –<br>5/14/2020 |                          |                          |                          |
| Shimane   | 4/16/2020 –<br>5/14/2020 |                          |                          |                          |
| Okayama   | 4/16/2020 –<br>5/14/2020 | 5/16/2021 –<br>6/20/2021 | 8/27/2021 –<br>9/12/2021 |                          |
| Hiroshima | 4/16/2020 –<br>5/14/2020 | 5/16/2021 –<br>6/20/2021 | 8/27/2021 –<br>9/30/2021 |                          |
| Yamaguchi | None                     |                          |                          |                          |
| Tokushima | 4/16/2020 –<br>5/14/2020 |                          |                          |                          |
| Kagawa    | 4/16/2020 –<br>5/14/2020 |                          |                          |                          |
| Ehime     | 4/16/2020 –<br>5/14/2020 |                          |                          |                          |
| Kochi     | 4/16/2020 –<br>5/14/2020 |                          |                          |                          |
| Fukuoka   | 4/7/2020 –<br>5/14/2020  | 1/14/2021 –<br>2/28/2021 | 5/12/2021 –<br>6/20/2021 | 8/20/2021 –<br>9/30/2021 |
| Saga      | 4/16/2020 –<br>5/14/2020 |                          |                          |                          |
| Nagasaki  | 4/16/2020 –<br>5/14/2020 |                          |                          |                          |
| Kumamoto  | 4/16/2020 –<br>5/14/2020 |                          |                          |                          |
| Oita      | 4/16/2020 –<br>5/14/2020 |                          |                          |                          |
| Miyazaki  | 4/16/2020 –<br>5/14/2020 |                          |                          |                          |
| Kagoshima | 4/16/2020 –<br>5/14/2020 |                          |                          |                          |
| Okinawa   | 4/16/2020 –<br>5/14/2020 | 5/23/2021 –<br>9/30/2021 |                          |                          |

14

15 **Supplemental Methods**

16

17

18 *Stratifications of STI surveillance data*

19

20 Weekly/monthly STI surveillance reports do not include detailed demographic data such  
21 as age, sex, occupation, or sexual orientation for all diseases, but there are some  
22 exceptions. Chlamydia, gonorrhoea, condyloma, and herpes data are available stratified  
23 by sex. HIV/AIDS data are available stratified by sex of sexual partners (sexual contact  
24 exclusively with the opposite sex, sexual contact exclusively with the same sex, and  
25 sexual activity with both men and women); however, the data are not stratified by sex  
26 (male/female). Furthermore, some cases are not classified into any of these sexual  
27 contact categories. Finally, syphilis data is stratified by stage (asymptomatic [i.e.,  
28 incidentally positive RPR testing], stage 1, stage 2, late-stage, and congenital). Where  
29 stratifications were available, we have conducted stratified analyses that follow the  
30 same methodology as explained below. These findings are presented in the remainder  
31 of the Supplementary Material.

32

33 *Sentinel surveillance of genital chlamydia, gonorrhoea, condyloma acuminata, and*  
34 *genital herpes*

35

36 Every year, approximately 900-1000 sentinel medical institutions are selected from  
37 across Japan, and monthly statistics detailing the average number of diagnoses per  
38 institution is made openly available. The location and number of sentinel medical

39 institutions in each prefecture are determined by considering the relative population of  
40 each health center's area of jurisdiction and the ability to identify the incidence trends for  
41 the entire prefecture.<sup>1,2</sup> In Japan, patients who suspect that they have an STI generally  
42 visit general hospitals, infectious disease clinics, urology clinics, obstetrics/gynecology  
43 clinics, general internal medicine clinics, or clinics specializing in sexually transmitted  
44 infections to be tested for STIs at the physician's discretion.

45

46 Sentinel sites specifically designated for STI surveillance include “medical facilities  
47 declaring that they have a gynecology and obstetrics department, obstetrics department  
48 or gynecology department (i.e., a gynecology and obstetrics specialty), a department  
49 whose name is combined with sexually transmitted infections (STIs) pursuant to the  
50 provisions of Article 3-2, paragraph 1, item (i), c and d (2) of the Enforcement Order of  
51 the Medical Care Act (Cabinet Order No. 326 of 1948), a urology department or  
52 dermatology department (i.e., medical facilities mainly providing medical services of the  
53 specialty so declared)...”<sup>3</sup>

54

55 *Diagnostic criteria for nationally notifiable STIs and those monitored by sentinel*  
56 *surveillance*

57

58 In order to count as part of notifiable disease surveillance, diagnoses of syphilis<sup>4</sup> require  
59 laboratory confirmation, and HIV/AIDS diagnoses require laboratory-confirmed HIV  
60 infection with or without AIDS-related infection or malignancy.<sup>5</sup> HIV diagnoses are listed  
61 as “asymptomatic carriers” and reported in aggregate with new AIDS diagnoses. In

62 order to count as part of sentinel surveillance, diagnoses of chlamydia<sup>6</sup> and gonorrhoea<sup>7</sup>  
63 are made via laboratory confirmation, whereas condyloma<sup>8</sup> and herpes<sup>9</sup> are diagnosed  
64 clinically. Please see eTable 2 for further details.

65

#### 66 *Regression Analysis: Farrington Approach*

67

68 Weekly data comprised nationally reportable case numbers indicative of the true  
69 incidence of HIV/AIDS and syphilis; thus, the quasi-Poisson regression was applied to  
70 these numbers directly. However, the monthly data comprised the incidence of  
71 chlamydia, gonorrhoea, condyloma acuminata, and herpes at sentinel sites only, and the  
72 number of sentinel institutions varied slightly for any given month. Between 2015-2019,  
73 the number of sentinel institutions ranged from 961 to 991 across all months (mean 985,  
74 clinic counts for 2020-2021 were unavailable but estimates suggest they do not differ  
75 from prior years). Any changes in the number of sentinels reporting monthly would  
76 proportionately affect the number of STI notifications; thus, we corrected for fluctuations  
77 in the number of sentinel institutions by calculating average monthly per institution  
78 diagnoses, multiplying the resultant value by 100, and rounding the value to the nearest  
79 integer; estimated results were rescaled by 100 in order to reobtain per institution  
80 values.

81

82 To account for seasonality, periods not included in the reference period were evenly  
83 divided into three or nine sub-periods for monthly or weekly data, respectively, and each  
84 was encoded as a binary dummy variable. Thus, the regression model is given by:<sup>10</sup>

85

86

$$\log(E(Y_t)) = \alpha + \beta t + f^T(t)\gamma_f, \quad (1)$$

87

88

$$E(Y_t) = \mu, \text{ and}$$

89

$$\text{Var}(Y_t) = \phi\mu,$$

90

91

92 where  $Y_t$  is the monthly number of diagnoses for a certain week or month  $t$ ,  $\alpha$  and  $\beta$  are  
93 regression parameters,  $\gamma_{f(t)}$  is a regression parameter vector to control for seasonality,  
94 and  $f(t)$  is a vector of dummies for the aforementioned dummy variables. The  
95 regression coefficients and the overdispersion parameter  $\phi$  were estimated using the  
96 quasi-likelihood method.

97

98 In order to estimate the baseline in Equation (1), we used data from 2013-2017 and  
99 predicted expected monthly case numbers for 2018-2021 using a 5-year moving  
100 window (e.g., predictions for 2020 were made using data from 2015-2019). By  
101 substituting the estimated regression parameters into Equation (1), the expected  
102 number was predicted for the week or month of interest  $t_0$ . We estimated two one-sided  
103 95% prediction intervals (PI) with the assumption that  $Y_{t_0} \sim NB(\widehat{Y}_{t_0}, \widehat{\nu}_0)$ , where NB is a  
104 negative binomial distribution,  $\widehat{Y}_{t_0}$  is the mean of the distribution, and  $\widehat{\nu}_0 = \frac{\widehat{Y}_{t_0}}{\widehat{\phi}-1}$  is the  
105 dispersion parameter. Observed values that fell above or below the upper or lower 95%  
106 prediction interval were regarded as statistically significant excesses or deficits,  
107 respectively. Additional information regarding the Farrington algorithm can be found  
108 elsewhere.<sup>11, 12</sup>

109

110 *Sensitivity Analyses*

111

112 When estimating the expectation, the algorithm restricts the time period of the observed  
113 data (defined as the *reference period*) based on several parameters. To estimate the  
114 expected number of cases for a given calendar week or month  $t$ , the algorithm uses  
115 only data from  $t - w$  to  $t + w$  weeks or months among years  $h - b$  and  $h - 1$ , where  $h$  is  
116 the year of  $t$  and  $w$  and  $b$  are pre-fixed constants. For monthly data (i.e., sentinel STIs),  
117  $b$  and  $w$  were set at 5 and 1, respectively; for weekly data (i.e., notifiable STIs),  $b$  and  $w$   
118 were set at 5 and 3, respectively.<sup>11</sup>

119

120 In order to check the stability of our model, we varied the parameters of  $b$  and  $w$  for  
121 weekly and monthly regressions. For weekly data, we tested all combinations of  
122  $b = 3$  or 5 and  $w = 3$  or 4. For monthly data, we tested all combinations of  $b = 3$  or 5 or  
123  $w = 1$  or 2. Because sentinel STI reporting was based on a variable number of sentinel  
124 institutions every month, we adjusted for these changes by calculating per-institution  
125 rates, multiplying those rates by 100, conducting the regression, and rescaling down to  
126 per-institution values. We also tested whether the regression changed materially after  
127 multiplying average monthly per sentinel values by 1000 instead of 100.

128

129 *Methodologic Limitations*

130

131 First, the Farrington algorithm is intended to detect significant deviations in STI reporting  
132 when compared to historical trends. Thus, our results are based on temporal



133 correlations with the pandemic; we are unable to make definitive assessments of  
134 causality. Second, the quasi-Poisson regression can passively capture gradual changes  
135 in trends over time but does not consider abrupt events that would dramatically alter  
136 reporting. Therefore, we are unable to assess the effect of unknown confounders which  
137 may have caused sudden shocks in the STI notification landscape. Third, because  
138 sentinel STI reporting was based on a variable number of sentinel institutions every  
139 month, we adjusted for these changes by calculating per-institution rates, multiplying  
140 those rates by 100, conducting the regression, and rescaling down to per-institution  
141 values. Our sensitivity analyses showed that using the 1000-based scale increased the  
142 sensitivity of our analyses; thus, the results presented in the main text of this study  
143 represent a conservative assessment of the trends in sentinel STIs. This limitation does  
144 not apply to the notifiable STIs.

145

146 **eTable 2.** Case definitions and reporting criteria for STI per National Institute of  
 147 Infectious Disease guidelines.

148  
 149

| STI       | Case Definition                                                                                                                                                                                                                        | Reporting Details                                                                                                                                                                                                                                                                                                                                                                                       |
|-----------|----------------------------------------------------------------------------------------------------------------------------------------------------------------------------------------------------------------------------------------|---------------------------------------------------------------------------------------------------------------------------------------------------------------------------------------------------------------------------------------------------------------------------------------------------------------------------------------------------------------------------------------------------------|
| Chlamydia | The prescribed test methods include detection of <i>C. trachomatis</i> in specimens collected from the urethra or genitals, detection of <i>C. trachomatis</i> antigens or genes, or detection of antibodies in serum.                 | Reported monthly by participating sentinel institutions                                                                                                                                                                                                                                                                                                                                                 |
| Gonorrhea | Established testing methods include the detection of <i>N. gonorrhoeae</i> in materials collected from the urethra and genitals, ocular secretions, and pharyngeal swabs, or the detection of <i>N. gonorrhoeae</i> antigens or genes. | Reported monthly by participating sentinel institutions                                                                                                                                                                                                                                                                                                                                                 |
| Condyloma | The clinical symptoms required for notification are "characteristic papillary or corpus callosum-like lesions of light red or brown color in and around the genitals in both men and women.                                            | Reported monthly by participating sentinel institutions                                                                                                                                                                                                                                                                                                                                                 |
| Herpes    | The clinical symptoms required for notification are "one to many small painful bullous or shallow ulcerative lesions characteristic of herpes on the genitals or buttocks in both men and women.                                       | Reported monthly by participating sentinel institutions                                                                                                                                                                                                                                                                                                                                                 |
| HIV/AIDS  | The prescribed test methods include HIV antibody screening test using serum and antibody confirmation tests (Western Blot method, etc.) or HIV antigen test, virus isolation, and nucleic acid diagnostic methods (PCR, etc.).         | All medical institutions report cases of HIV/AIDS within 7 days of diagnosis if the patient is "suspected of having HIV/AIDS based on clinical characteristics or is asymptomatic but diagnosed using the established testing methods." Data is aggregated weekly. Information to be reported includes gender, age, HIV type, suspected route of infection, clinical symptoms, CD4 level at the time of |

|          |                                                                                                                                                                                                                               | diagnosis, and method of diagnosis                                                                                                                                                                                                                                                                                                                                                                                        |
|----------|-------------------------------------------------------------------------------------------------------------------------------------------------------------------------------------------------------------------------------|---------------------------------------------------------------------------------------------------------------------------------------------------------------------------------------------------------------------------------------------------------------------------------------------------------------------------------------------------------------------------------------------------------------------------|
| Syphilis | Prescribed testing methods include detection of pathogens by PCR or other tests on lesions (early induration, induration chancre, condyloma flatum, mucosal rash), and serum tests using cardiolipin or T. pallidum antigens. | All medical institutions report cases of "suspected syphilis based on clinical features or asymptomatic but diagnosed by established laboratory methods" as syphilis within 7 days of diagnosis. Data is aggregated weekly. Information to be reported includes gender, age, stage, pregnancy status, clinical symptoms, diagnostic methods, suspected route and place of infection, and previous treatment for syphilis. |

150

151 **Results: Sensitivity Analyses**

152

153 *Sentinel STIs*

154

155 Based on visual inspection, the variation of the parameters  $b$  and  $w$  did not elicit  
156 substantial changes in the fit of the quasi-Poisson regression models for chlamydia,  
157 gonorrhoea, condyloma, or herpes. Multiplying per institution values by 1000 instead of  
158 100 slightly increased the sensitivity of detecting diagnostic excesses or deficits for any  
159 given month.

160

161 *Notifiable STIs*

162

163 Based on visual inspection, the variation of the parameters  $b$  and  $w$  did not elicit  
164 substantial changes in the fit of the quasi-Poisson regression models for HIV/AIDS or  
165 syphilis.

166

167 **eTable 3.** Dates corresponding to week numbers, 2020-2021.

168

| Week in 2020 | Start Date | Week in 2021 | Start Date |
|--------------|------------|--------------|------------|
| 1            | 06-Jan-20  | 1            | 04-Jan-21  |
| 2            | 13-Jan-20  | 2            | 11-Jan-21  |
| 3            | 20-Jan-20  | 3            | 18-Jan-21  |
| 4            | 27-Jan-20  | 4            | 25-Jan-21  |
| 5            | 03-Feb-20  | 5            | 01-Feb-21  |
| 6            | 10-Feb-20  | 6            | 08-Feb-21  |
| 7            | 17-Feb-20  | 7            | 15-Feb-21  |
| 8            | 24-Feb-20  | 8            | 22-Feb-21  |
| 9            | 02-Mar-20  | 9            | 01-Mar-21  |
| 10           | 09-Mar-20  | 10           | 08-Mar-21  |
| 11           | 16-Mar-20  | 11           | 15-Mar-21  |
| 12           | 23-Mar-20  | 12           | 22-Mar-21  |
| 13           | 30-Mar-20  | 13           | 29-Mar-21  |
| 14           | 06-Apr-20  | 14           | 05-Apr-21  |
| 15           | 13-Apr-20  | 15           | 12-Apr-21  |
| 16           | 20-Apr-20  | 16           | 19-Apr-21  |
| 17           | 27-Apr-20  | 17           | 26-Apr-21  |
| 18           | 04-May-20  | 18           | 03-May-21  |
| 19           | 11-May-20  | 19           | 10-May-21  |
| 20           | 18-May-20  | 20           | 17-May-21  |
| 21           | 25-May-20  | 21           | 24-May-21  |
| 22           | 01-Jun-20  | 22           | 31-May-21  |
| 23           | 08-Jun-20  | 23           | 07-Jun-21  |
| 24           | 15-Jun-20  | 24           | 14-Jun-21  |
| 25           | 22-Jun-20  | 25           | 21-Jun-21  |
| 26           | 29-Jun-20  | 26           | 28-Jun-21  |
| 27           | 06-Jul-20  | 27           | 05-Jul-21  |
| 28           | 13-Jul-20  | 28           | 12-Jul-21  |
| 29           | 20-Jul-20  | 29           | 19-Jul-21  |
| 30           | 27-Jul-20  | 30           | 26-Jul-21  |
| 31           | 03-Aug-20  | 31           | 02-Aug-21  |
| 32           | 10-Aug-20  | 32           | 09-Aug-21  |
| 33           | 17-Aug-20  | 33           | 16-Aug-21  |
| 34           | 24-Aug-20  | 34           | 23-Aug-21  |
| 35           | 31-Aug-20  | 35           | 30-Aug-21  |
| 36           | 07-Sep-20  | 36           | 06-Sep-21  |
| 37           | 14-Sep-20  | 37           | 13-Sep-21  |
| 38           | 21-Sep-20  | 38           | 20-Sep-21  |
| 39           | 28-Sep-20  | 39           | 27-Sep-21  |
| 40           | 05-Oct-20  | 40           | 04-Oct-21  |
| 41           | 12-Oct-20  | 41           | 11-Oct-21  |
| 42           | 19-Oct-20  | 42           | 18-Oct-21  |
| 43           | 26-Oct-20  | 43           | 25-Oct-21  |
| 44           | 02-Nov-20  | 44           | 01-Nov-21  |
| 45           | 09-Nov-20  | 45           | 08-Nov-21  |
| 46           | 16-Nov-20  | 46           | 15-Nov-21  |
| 47           | 23-Nov-20  | 47           | 22-Nov-21  |
| 48           | 30-Nov-20  | 48           | 29-Nov-21  |
| 49           | 07-Dec-20  | 49           | 06-Dec-21  |
| 50           | 14-Dec-20  | 50           | 13-Dec-21  |
| 51           | 21-Dec-20  | 51           | 20-Dec-21  |
| 52           | 28-Dec-20  | 52           | 27-Dec-21  |

169  
170  
171  
172

**eTable 4.** Observed and expected number of genital chlamydia diagnoses per sentinel institution with 95% prediction intervals, 2018-2021. Parameters:  $b = 5$  and  $w = 1$ .

| Year | Month | Observed | Predicted | Scale by 100       |                    | Scale by 1000      |                    |
|------|-------|----------|-----------|--------------------|--------------------|--------------------|--------------------|
|      |       |          |           | 95% PI upper bound | 95% PI lower bound | 95% PI upper bound | 95% PI lower bound |
| 2018 | 1     | 2.01     | 1.88      | 2.17               | 1.72               | 2.1                | 1.79               |
| 2018 | 2     | 1.88     | 1.9       | 2.2                | 1.74               | 2.14               | 1.8                |
| 2018 | 3     | 2.1      | 1.9       | 2.18               | 1.72               | 2.08               | 1.82               |
| 2018 | 4     | 1.88     | 1.98      | 2.28               | 1.81               | 2.21               | 1.88               |
| 2018 | 5     | 2.24     | 2.05      | 2.37               | 1.89               | 2.32               | 1.94               |
| 2018 | 6     | 2.24     | 2.14      | 2.44               | 1.95               | 2.33               | 2.06               |
| 2018 | 7     | 2.21     | 2.15      | 2.47               | 1.98               | 2.4                | 2.05               |
| 2018 | 8     | 2.31     | 2.17      | 2.49               | 2                  | 2.44               | 2.06               |
| 2018 | 9     | 2.21     | 2.17      | 2.47               | 1.98               | 2.36               | 2.09               |
| 2018 | 10    | 2.37     | 2.13      | 2.45               | 1.96               | 2.37               | 2.03               |
| 2018 | 11    | 2.32     | 2.04      | 2.36               | 1.88               | 2.31               | 1.93               |
| 2018 | 12    | 2.09     | 1.98      | 2.27               | 1.8                | 2.17               | 1.9                |
| 2019 | 1     | 2.22     | 1.95      | 2.26               | 1.79               | 2.2                | 1.85               |
| 2019 | 2     | 2.04     | 1.97      | 2.28               | 1.81               | 2.24               | 1.86               |
| 2019 | 3     | 2.27     | 1.96      | 2.25               | 1.78               | 2.15               | 1.88               |
| 2019 | 4     | 2.17     | 2.05      | 2.36               | 1.88               | 2.3                | 1.94               |
| 2019 | 5     | 2.23     | 2.12      | 2.45               | 1.96               | 2.41               | 2                  |
| 2019 | 6     | 2.32     | 2.24      | 2.55               | 2.05               | 2.46               | 2.14               |
| 2019 | 7     | 2.47     | 2.25      | 2.58               | 2.08               | 2.51               | 2.15               |
| 2019 | 8     | 2.39     | 2.28      | 2.62               | 2.12               | 2.59               | 2.16               |
| 2019 | 9     | 2.4      | 2.31      | 2.63               | 2.12               | 2.53               | 2.22               |
| 2019 | 10    | 2.57     | 2.28      | 2.61               | 2.11               | 2.55               | 2.18               |
| 2019 | 11    | 2.27     | 2.22      | 2.56               | 2.06               | 2.52               | 2.1                |
| 2019 | 12    | 2.34     | 2.16      | 2.47               | 1.98               | 2.37               | 2.07               |
| 2020 | 1     | 2.47     | 2.11      | 2.43               | 1.94               | 2.35               | 2.02               |
| 2020 | 2     | 2.36     | 2.15      | 2.48               | 1.99               | 2.43               | 2.04               |
| 2020 | 3     | 2.45     | 2.14      | 2.45               | 1.96               | 2.35               | 2.06               |
| 2020 | 4     | 2.24     | 2.23      | 2.55               | 2.05               | 2.46               | 2.14               |
| 2020 | 5     | 2.22     | 2.31      | 2.65               | 2.14               | 2.59               | 2.19               |
| 2020 | 6     | 2.37     | 2.42      | 2.74               | 2.23               | 2.64               | 2.33               |
| 2020 | 7     | 2.48     | 2.46      | 2.8                | 2.27               | 2.72               | 2.35               |
| 2020 | 8     | 2.49     | 2.49      | 2.85               | 2.32               | 2.8                | 2.37               |

|      |    |      |      |      |      |      |      |
|------|----|------|------|------|------|------|------|
| 2020 | 9  | 2.48 | 2.54 | 2.88 | 2.35 | 2.78 | 2.44 |
| 2020 | 10 | 2.69 | 2.51 | 2.86 | 2.33 | 2.79 | 2.4  |
| 2020 | 11 | 2.28 | 2.45 | 2.8  | 2.28 | 2.76 | 2.32 |
| 2020 | 12 | 2.36 | 2.38 | 2.71 | 2.19 | 2.62 | 2.28 |
| 2021 | 1  | 2.38 | 2.34 | 2.67 | 2.16 | 2.6  | 2.23 |
| 2021 | 2  | 2.33 | 2.37 | 2.72 | 2.2  | 2.67 | 2.26 |
| 2021 | 3  | 2.56 | 2.34 | 2.67 | 2.16 | 2.58 | 2.25 |
| 2021 | 4  | 2.41 | 2.41 | 2.75 | 2.23 | 2.67 | 2.3  |
| 2021 | 5  | 2.52 | 2.47 | 2.83 | 2.3  | 2.78 | 2.35 |
| 2021 | 6  | 2.69 | 2.56 | 2.91 | 2.37 | 2.82 | 2.46 |
| 2021 | 7  | 2.76 | 2.61 | 2.96 | 2.42 | 2.9  | 2.49 |
| 2021 | 8  | 2.61 | 2.64 | 3.01 | 2.46 | 2.96 | 2.52 |
| 2021 | 9  | 2.59 | 2.69 | 3.04 | 2.49 | 2.93 | 2.59 |
| 2021 | 10 | 2.61 | 2.65 | 3.01 | 2.47 | 2.94 | 2.54 |
| 2021 | 11 | 2.53 | 2.60 | 2.96 | 2.42 | 2.90 | 2.48 |
| 2021 | 12 | 2.50 | 2.52 | 2.86 | 2.33 | 2.76 | 2.42 |

173

174

PI = prediction interval

175 **eTable 5.** Observed and expected number of gonorrhoea diagnoses per sentinel  
 176 institution with 95% prediction intervals, 2018-2021. Parameters:  $b = 5$  and  $w = 1$ .  
 177

| Year | Month | Observed | Predicted | Scale by 100       |                    | Scale by 1000      |                    |
|------|-------|----------|-----------|--------------------|--------------------|--------------------|--------------------|
|      |       |          |           | 95% PI upper bound | 95% PI lower bound | 95% PI upper bound | 95% PI lower bound |
| 2018 | 1     | 0.69     | 0.62      | 0.79               | 0.53               | 0.74               | 0.57               |
| 2018 | 2     | 0.56     | 0.62      | 0.79               | 0.52               | 0.73               | 0.57               |
| 2018 | 3     | 0.67     | 0.6       | 0.76               | 0.5                | 0.7                | 0.55               |
| 2018 | 4     | 0.61     | 0.6       | 0.76               | 0.5                | 0.72               | 0.55               |
| 2018 | 5     | 0.72     | 0.6       | 0.77               | 0.51               | 0.71               | 0.56               |
| 2018 | 6     | 0.65     | 0.64      | 0.81               | 0.54               | 0.75               | 0.59               |
| 2018 | 7     | 0.71     | 0.67      | 0.84               | 0.57               | 0.79               | 0.62               |
| 2018 | 8     | 0.82     | 0.69      | 0.86               | 0.58               | 0.81               | 0.64               |
| 2018 | 9     | 0.72     | 0.68      | 0.85               | 0.57               | 0.79               | 0.63               |
| 2018 | 10    | 0.72     | 0.65      | 0.82               | 0.55               | 0.77               | 0.59               |
| 2018 | 11    | 0.67     | 0.6       | 0.77               | 0.51               | 0.71               | 0.56               |
| 2018 | 12    | 0.7      | 0.61      | 0.77               | 0.51               | 0.71               | 0.56               |
| 2019 | 1     | 0.76     | 0.59      | 0.76               | 0.5                | 0.72               | 0.54               |
| 2019 | 2     | 0.62     | 0.6       | 0.76               | 0.5                | 0.71               | 0.55               |
| 2019 | 3     | 0.67     | 0.57      | 0.73               | 0.48               | 0.68               | 0.53               |
| 2019 | 4     | 0.7      | 0.59      | 0.76               | 0.5                | 0.72               | 0.54               |
| 2019 | 5     | 0.72     | 0.6       | 0.76               | 0.5                | 0.72               | 0.55               |
| 2019 | 6     | 0.65     | 0.64      | 0.81               | 0.54               | 0.75               | 0.59               |
| 2019 | 7     | 0.77     | 0.68      | 0.86               | 0.58               | 0.82               | 0.63               |
| 2019 | 8     | 0.77     | 0.72      | 0.9                | 0.62               | 0.85               | 0.67               |
| 2019 | 9     | 0.72     | 0.72      | 0.9                | 0.61               | 0.83               | 0.67               |
| 2019 | 10    | 0.68     | 0.69      | 0.87               | 0.59               | 0.82               | 0.63               |
| 2019 | 11    | 0.6      | 0.66      | 0.84               | 0.56               | 0.78               | 0.62               |
| 2019 | 12    | 0.69     | 0.68      | 0.85               | 0.57               | 0.78               | 0.63               |
| 2020 | 1     | 0.79     | 0.65      | 0.82               | 0.55               | 0.77               | 0.6                |
| 2020 | 2     | 0.65     | 0.66      | 0.83               | 0.55               | 0.77               | 0.62               |
| 2020 | 3     | 0.61     | 0.63      | 0.8                | 0.53               | 0.73               | 0.59               |
| 2020 | 4     | 0.6      | 0.65      | 0.82               | 0.55               | 0.77               | 0.61               |
| 2020 | 5     | 0.55     | 0.65      | 0.82               | 0.55               | 0.75               | 0.61               |
| 2020 | 6     | 0.64     | 0.68      | 0.85               | 0.58               | 0.79               | 0.64               |
| 2020 | 7     | 0.79     | 0.72      | 0.9                | 0.61               | 0.84               | 0.67               |
| 2020 | 8     | 0.77     | 0.75      | 0.93               | 0.64               | 0.87               | 0.71               |
| 2020 | 9     | 0.79     | 0.74      | 0.92               | 0.63               | 0.85               | 0.7                |



|      |    |      |      |      |      |      |      |
|------|----|------|------|------|------|------|------|
| 2020 | 10 | 0.88 | 0.7  | 0.88 | 0.6  | 0.82 | 0.65 |
| 2020 | 11 | 0.79 | 0.67 | 0.84 | 0.57 | 0.78 | 0.63 |
| 2020 | 12 | 0.74 | 0.67 | 0.85 | 0.57 | 0.79 | 0.63 |
| 2021 | 1  | 0.85 | 0.66 | 0.83 | 0.56 | 0.78 | 0.61 |
| 2021 | 2  | 0.73 | 0.66 | 0.83 | 0.56 | 0.77 | 0.61 |
| 2021 | 3  | 0.8  | 0.63 | 0.8  | 0.53 | 0.74 | 0.59 |
| 2021 | 4  | 0.9  | 0.65 | 0.82 | 0.55 | 0.78 | 0.59 |
| 2021 | 5  | 0.85 | 0.66 | 0.84 | 0.56 | 0.79 | 0.61 |
| 2021 | 6  | 0.9  | 0.71 | 0.89 | 0.6  | 0.84 | 0.66 |
| 2021 | 7  | 1.02 | 0.76 | 0.95 | 0.66 | 0.91 | 0.7  |
| 2021 | 8  | 0.9  | 0.8  | 1    | 0.7  | 0.96 | 0.74 |
| 2021 | 9  | 0.85 | 0.81 | 1    | 0.7  | 0.95 | 0.75 |
| 2021 | 10 | 0.94 | 0.78 | 0.98 | 0.68 | 0.95 | 0.72 |
| 2021 | 11 | 0.92 | 0.77 | 0.97 | 0.67 | 0.94 | 0.71 |
| 2021 | 12 | 0.91 | 0.79 | 0.99 | 0.69 | 0.96 | 0.73 |

178  
179  
180

PI = prediction interval

181 **eTable 6.** Observed and expected number of condyloma acuminata diagnoses per  
 182 sentinel institution with 95% prediction intervals, 2018-2021. Parameters:  $b = 5$  and  $w =$   
 183  $1$ .  
 184

| Year | Month | Observed | Predicted | Scale by 100       |                    | Scale by 1000      |                    |
|------|-------|----------|-----------|--------------------|--------------------|--------------------|--------------------|
|      |       |          |           | 95% PI upper bound | 95% PI lower bound | 95% PI upper bound | 95% PI lower bound |
| 2018 | 1     | 0.42     | 0.44      | 0.56               | 0.34               | 0.49               | 0.41               |
| 2018 | 2     | 0.38     | 0.45      | 0.58               | 0.36               | 0.52               | 0.42               |
| 2018 | 3     | 0.46     | 0.45      | 0.57               | 0.35               | 0.5                | 0.42               |
| 2018 | 4     | 0.47     | 0.47      | 0.6                | 0.37               | 0.53               | 0.44               |
| 2018 | 5     | 0.52     | 0.48      | 0.62               | 0.38               | 0.55               | 0.45               |
| 2018 | 6     | 0.54     | 0.5       | 0.63               | 0.4                | 0.56               | 0.47               |
| 2018 | 7     | 0.51     | 0.49      | 0.63               | 0.39               | 0.55               | 0.46               |
| 2018 | 8     | 0.5      | 0.48      | 0.62               | 0.39               | 0.56               | 0.45               |
| 2018 | 9     | 0.43     | 0.47      | 0.61               | 0.38               | 0.53               | 0.45               |
| 2018 | 10    | 0.55     | 0.46      | 0.6                | 0.37               | 0.52               | 0.44               |
| 2018 | 11    | 0.49     | 0.44      | 0.57               | 0.35               | 0.51               | 0.41               |
| 2018 | 12    | 0.42     | 0.43      | 0.56               | 0.34               | 0.49               | 0.4                |
| 2019 | 1     | 0.59     | 0.41      | 0.54               | 0.33               | 0.47               | 0.39               |
| 2019 | 2     | 0.44     | 0.43      | 0.56               | 0.34               | 0.5                | 0.4                |
| 2019 | 3     | 0.51     | 0.43      | 0.56               | 0.34               | 0.5                | 0.41               |
| 2019 | 4     | 0.47     | 0.46      | 0.59               | 0.37               | 0.53               | 0.43               |
| 2019 | 5     | 0.51     | 0.48      | 0.62               | 0.39               | 0.56               | 0.44               |
| 2019 | 6     | 0.58     | 0.5       | 0.64               | 0.4                | 0.57               | 0.47               |
| 2019 | 7     | 0.6      | 0.49      | 0.63               | 0.39               | 0.56               | 0.46               |
| 2019 | 8     | 0.54     | 0.49      | 0.64               | 0.4                | 0.59               | 0.45               |
| 2019 | 9     | 0.55     | 0.49      | 0.63               | 0.4                | 0.58               | 0.45               |
| 2019 | 10    | 0.56     | 0.49      | 0.63               | 0.4                | 0.58               | 0.45               |
| 2019 | 11    | 0.53     | 0.46      | 0.61               | 0.38               | 0.56               | 0.42               |
| 2019 | 12    | 0.49     | 0.46      | 0.6                | 0.37               | 0.55               | 0.42               |
| 2020 | 1     | 0.52     | 0.44      | 0.58               | 0.36               | 0.53               | 0.41               |
| 2020 | 2     | 0.44     | 0.47      | 0.62               | 0.39               | 0.57               | 0.43               |
| 2020 | 3     | 0.5      | 0.47      | 0.61               | 0.38               | 0.56               | 0.43               |
| 2020 | 4     | 0.43     | 0.51      | 0.66               | 0.42               | 0.6                | 0.47               |
| 2020 | 5     | 0.44     | 0.53      | 0.69               | 0.44               | 0.64               | 0.49               |
| 2020 | 6     | 0.58     | 0.56      | 0.71               | 0.46               | 0.65               | 0.52               |
| 2020 | 7     | 0.48     | 0.55      | 0.71               | 0.46               | 0.65               | 0.51               |
| 2020 | 8     | 0.47     | 0.54      | 0.7                | 0.45               | 0.65               | 0.5                |

|      |    |      |      |      |      |      |      |
|------|----|------|------|------|------|------|------|
| 2020 | 9  | 0.53 | 0.53 | 0.69 | 0.44 | 0.63 | 0.5  |
| 2020 | 10 | 0.52 | 0.53 | 0.69 | 0.44 | 0.63 | 0.49 |
| 2020 | 11 | 0.41 | 0.51 | 0.66 | 0.42 | 0.62 | 0.46 |
| 2020 | 12 | 0.46 | 0.5  | 0.65 | 0.41 | 0.6  | 0.46 |
| 2021 | 1  | 0.45 | 0.48 | 0.62 | 0.39 | 0.57 | 0.44 |
| 2021 | 2  | 0.42 | 0.49 | 0.64 | 0.41 | 0.61 | 0.44 |
| 2021 | 3  | 0.47 | 0.47 | 0.62 | 0.39 | 0.58 | 0.43 |
| 2021 | 4  | 0.51 | 0.51 | 0.66 | 0.42 | 0.62 | 0.47 |
| 2021 | 5  | 0.49 | 0.53 | 0.69 | 0.44 | 0.65 | 0.48 |
| 2021 | 6  | 0.48 | 0.55 | 0.71 | 0.46 | 0.66 | 0.51 |
| 2021 | 7  | 0.48 | 0.55 | 0.71 | 0.46 | 0.66 | 0.5  |
| 2021 | 8  | 0.5  | 0.53 | 0.7  | 0.45 | 0.66 | 0.48 |
| 2021 | 9  | 0.46 | 0.53 | 0.69 | 0.44 | 0.64 | 0.48 |
| 2021 | 10 | 0.51 | 0.52 | 0.68 | 0.43 | 0.63 | 0.47 |
| 2021 | 11 | 0.49 | 0.50 | 0.66 | 0.42 | 0.62 | 0.45 |
| 2021 | 12 | 0.44 | 0.49 | 0.64 | 0.40 | 0.60 | 0.45 |

185  
186  
187

PI = prediction interval

188 **eTable 7.** Observed and expected number of genital herpes diagnoses per sentinel  
 189 institution with 95% prediction intervals, 2018-2021. Parameters:  $b = 5$  and  $w = 1$ .  
 190

| Year | Month | Observed | Predicted | Scale by 100       |                    | Scale by 1000      |                    |
|------|-------|----------|-----------|--------------------|--------------------|--------------------|--------------------|
|      |       |          |           | 95% PI upper bound | 95% PI lower bound | 95% PI upper bound | 95% PI lower bound |
| 2018 | 1     | 0.75     | 0.77      | 0.95               | 0.65               | 0.86               | 0.74               |
| 2018 | 2     | 0.7      | 0.79      | 0.96               | 0.67               | 0.88               | 0.75               |
| 2018 | 3     | 0.77     | 0.78      | 0.96               | 0.66               | 0.87               | 0.75               |
| 2018 | 4     | 0.79     | 0.81      | 0.98               | 0.68               | 0.9                | 0.77               |
| 2018 | 5     | 0.81     | 0.82      | 1                  | 0.7                | 0.92               | 0.78               |
| 2018 | 6     | 0.79     | 0.83      | 1.01               | 0.71               | 0.92               | 0.8                |
| 2018 | 7     | 0.83     | 0.83      | 1.01               | 0.71               | 0.92               | 0.79               |
| 2018 | 8     | 0.82     | 0.81      | 0.99               | 0.69               | 0.91               | 0.77               |
| 2018 | 9     | 0.69     | 0.8       | 0.97               | 0.68               | 0.89               | 0.76               |
| 2018 | 10    | 0.77     | 0.78      | 0.95               | 0.66               | 0.87               | 0.74               |
| 2018 | 11    | 0.78     | 0.77      | 0.94               | 0.65               | 0.86               | 0.73               |
| 2018 | 12    | 0.76     | 0.76      | 0.94               | 0.64               | 0.85               | 0.73               |
| 2019 | 1     | 0.74     | 0.76      | 0.94               | 0.65               | 0.85               | 0.73               |
| 2019 | 2     | 0.77     | 0.78      | 0.96               | 0.66               | 0.88               | 0.74               |
| 2019 | 3     | 0.8      | 0.78      | 0.96               | 0.66               | 0.87               | 0.75               |
| 2019 | 4     | 0.76     | 0.8       | 0.98               | 0.68               | 0.9                | 0.76               |
| 2019 | 5     | 0.79     | 0.81      | 0.99               | 0.69               | 0.91               | 0.77               |
| 2019 | 6     | 0.77     | 0.82      | 1                  | 0.7                | 0.92               | 0.79               |
| 2019 | 7     | 0.82     | 0.82      | 1                  | 0.69               | 0.91               | 0.78               |
| 2019 | 8     | 0.82     | 0.79      | 0.97               | 0.67               | 0.89               | 0.75               |
| 2019 | 9     | 0.87     | 0.78      | 0.95               | 0.66               | 0.87               | 0.75               |
| 2019 | 10    | 0.85     | 0.76      | 0.93               | 0.64               | 0.85               | 0.73               |
| 2019 | 11    | 0.78     | 0.76      | 0.93               | 0.64               | 0.86               | 0.72               |
| 2019 | 12    | 0.81     | 0.75      | 0.93               | 0.64               | 0.84               | 0.72               |
| 2020 | 1     | 0.82     | 0.75      | 0.93               | 0.64               | 0.84               | 0.72               |
| 2020 | 2     | 0.76     | 0.77      | 0.95               | 0.65               | 0.87               | 0.73               |
| 2020 | 3     | 0.76     | 0.78      | 0.95               | 0.66               | 0.86               | 0.74               |
| 2020 | 4     | 0.76     | 0.8       | 0.98               | 0.68               | 0.9                | 0.77               |
| 2020 | 5     | 0.62     | 0.82      | 1.01               | 0.7                | 0.92               | 0.78               |
| 2020 | 6     | 0.82     | 0.84      | 1.02               | 0.71               | 0.93               | 0.8                |
| 2020 | 7     | 0.76     | 0.84      | 1.02               | 0.72               | 0.93               | 0.8                |
| 2020 | 8     | 0.79     | 0.83      | 1.01               | 0.7                | 0.92               | 0.79               |
| 2020 | 9     | 0.78     | 0.82      | 0.99               | 0.69               | 0.9                | 0.78               |

|      |    |      |      |      |      |      |      |
|------|----|------|------|------|------|------|------|
| 2020 | 10 | 0.82 | 0.79 | 0.97 | 0.67 | 0.88 | 0.75 |
| 2020 | 11 | 0.72 | 0.79 | 0.97 | 0.67 | 0.89 | 0.75 |
| 2020 | 12 | 0.76 | 0.76 | 0.94 | 0.65 | 0.87 | 0.72 |
| 2021 | 1  | 0.73 | 0.76 | 0.94 | 0.65 | 0.86 | 0.72 |
| 2021 | 2  | 0.64 | 0.76 | 0.94 | 0.65 | 0.87 | 0.72 |
| 2021 | 3  | 0.82 | 0.76 | 0.94 | 0.64 | 0.86 | 0.71 |
| 2021 | 4  | 0.71 | 0.76 | 0.94 | 0.65 | 0.87 | 0.72 |
| 2021 | 5  | 0.71 | 0.78 | 0.96 | 0.67 | 0.89 | 0.74 |
| 2021 | 6  | 0.79 | 0.79 | 0.97 | 0.67 | 0.9  | 0.75 |
| 2021 | 7  | 0.77 | 0.8  | 0.98 | 0.68 | 0.91 | 0.76 |
| 2021 | 8  | 0.76 | 0.78 | 0.97 | 0.67 | 0.89 | 0.74 |
| 2021 | 9  | 0.75 | 0.78 | 0.96 | 0.66 | 0.89 | 0.73 |
| 2021 | 10 | 0.79 | 0.76 | 0.95 | 0.65 | 0.87 | 0.72 |
| 2021 | 11 | 0.83 | 0.76 | 0.94 | 0.65 | 0.88 | 0.71 |
| 2021 | 12 | 0.81 | 0.74 | 0.92 | 0.63 | 0.85 | 0.69 |

191

192

PI = prediction interval

193 **eTable 8.** Observed and expected number of HIV/AIDS diagnoses with 95% prediction  
 194 intervals, 2018-2021. Parameters:  $b = 5$  and  $w = 3$ .  
 195

| Year | Week | Observed | Predicted | 95% PI upper bound | 95% PI lower bound | Year | Week | Observed | Predicted | 95% PI upper bound | 95% PI lower bound |
|------|------|----------|-----------|--------------------|--------------------|------|------|----------|-----------|--------------------|--------------------|
| 2018 | 1    | 3        | 13.43     | 24                 | 8                  | 2020 | 1    | 9        | 11.06     | 20                 | 6                  |
| 2018 | 2    | 11       | 12.72     | 23                 | 7                  | 2020 | 2    | 7        | 11.01     | 20                 | 6                  |
| 2018 | 3    | 13       | 12.12     | 22                 | 7                  | 2020 | 3    | 6        | 11.32     | 21                 | 6                  |
| 2018 | 4    | 15       | 13.13     | 23                 | 8                  | 2020 | 4    | 15       | 12.33     | 22                 | 7                  |
| 2018 | 5    | 14       | 13.51     | 24                 | 8                  | 2020 | 5    | 7        | 12.81     | 23                 | 7                  |
| 2018 | 6    | 22       | 13.86     | 24                 | 8                  | 2020 | 6    | 9        | 13.43     | 24                 | 8                  |
| 2018 | 7    | 11       | 14.85     | 26                 | 9                  | 2020 | 7    | 7        | 13.15     | 23                 | 8                  |
| 2018 | 8    | 16       | 14.36     | 25                 | 9                  | 2020 | 8    | 5        | 12.96     | 23                 | 7                  |
| 2018 | 9    | 13       | 14.35     | 25                 | 9                  | 2020 | 9    | 8        | 12.53     | 22                 | 7                  |
| 2018 | 10   | 13       | 14.06     | 24                 | 8                  | 2020 | 10   | 12       | 12.81     | 23                 | 7                  |
| 2018 | 11   | 15       | 14.21     | 25                 | 8                  | 2020 | 11   | 5        | 12.83     | 23                 | 7                  |
| 2018 | 12   | 17       | 14.68     | 25                 | 9                  | 2020 | 12   | 18       | 12.75     | 23                 | 7                  |
| 2018 | 13   | 10       | 14.39     | 25                 | 9                  | 2020 | 13   | 5        | 12.07     | 22                 | 7                  |
| 2018 | 14   | 13       | 13.27     | 23                 | 8                  | 2020 | 14   | 10       | 10.70     | 20                 | 6                  |
| 2018 | 15   | 10       | 12.38     | 22                 | 7                  | 2020 | 15   | 6        | 10.69     | 20                 | 6                  |
| 2018 | 16   | 14       | 12.75     | 22                 | 7                  | 2020 | 16   | 5        | 11.05     | 20                 | 6                  |
| 2018 | 17   | 13       | 13.72     | 24                 | 8                  | 2020 | 17   | 7        | 10.88     | 20                 | 6                  |
| 2018 | 18   | 3        | 14.53     | 25                 | 9                  | 2020 | 18   | 3        | 11.23     | 21                 | 6                  |
| 2018 | 19   | 15       | 14.62     | 25                 | 9                  | 2020 | 19   | 15       | 11.60     | 21                 | 6                  |
| 2018 | 20   | 22       | 15.26     | 26                 | 9                  | 2020 | 20   | 10       | 12.13     | 22                 | 7                  |
| 2018 | 21   | 10       | 15.82     | 27                 | 10                 | 2020 | 21   | 12       | 13.50     | 24                 | 8                  |
| 2018 | 22   | 22       | 17.57     | 29                 | 11                 | 2020 | 22   | 9        | 13.94     | 24                 | 8                  |
| 2018 | 23   | 15       | 17.71     | 29                 | 12                 | 2020 | 23   | 17       | 13.88     | 24                 | 8                  |
| 2018 | 24   | 16       | 17.91     | 30                 | 12                 | 2020 | 24   | 8        | 14.05     | 24                 | 8                  |
| 2018 | 25   | 17       | 17.56     | 29                 | 11                 | 2020 | 25   | 10       | 12.95     | 23                 | 7                  |
| 2018 | 26   | 15       | 16.67     | 28                 | 11                 | 2020 | 26   | 11       | 13.26     | 23                 | 8                  |
| 2018 | 27   | 13       | 15.86     | 27                 | 10                 | 2020 | 27   | 9        | 13.13     | 23                 | 8                  |
| 2018 | 28   | 17       | 15.56     | 26                 | 10                 | 2020 | 28   | 15       | 13.19     | 23                 | 8                  |
| 2018 | 29   | 6        | 14.88     | 25                 | 9                  | 2020 | 29   | 8        | 12.82     | 23                 | 7                  |
| 2018 | 30   | 22       | 14.47     | 25                 | 9                  | 2020 | 30   | 11       | 12.65     | 23                 | 7                  |
| 2018 | 31   | 16       | 14.45     | 25                 | 9                  | 2020 | 31   | 5        | 12.59     | 23                 | 7                  |
| 2018 | 32   | 24       | 14.85     | 25                 | 9                  | 2020 | 32   | 7        | 12.85     | 23                 | 7                  |
| 2018 | 33   | 15       | 15.41     | 26                 | 10                 | 2020 | 33   | 14       | 12.53     | 23                 | 7                  |
| 2018 | 34   | 17       | 15.81     | 27                 | 10                 | 2020 | 34   | 6        | 11.69     | 22                 | 6                  |

|      |    |    |       |    |    |      |    |    |       |    |   |
|------|----|----|-------|----|----|------|----|----|-------|----|---|
| 2018 | 35 | 13 | 15.30 | 26 | 9  | 2020 | 35 | 11 | 11.38 | 21 | 6 |
| 2018 | 36 | 12 | 15.55 | 26 | 10 | 2020 | 36 | 8  | 11.09 | 21 | 6 |
| 2018 | 37 | 11 | 15.36 | 26 | 9  | 2020 | 37 | 14 | 10.97 | 20 | 6 |
| 2018 | 38 | 14 | 14.96 | 25 | 9  | 2020 | 38 | 7  | 11.13 | 21 | 6 |
| 2018 | 39 | 12 | 15.13 | 26 | 9  | 2020 | 39 | 10 | 11.18 | 21 | 6 |
| 2018 | 40 | 14 | 14.79 | 25 | 9  | 2020 | 40 | 15 | 10.56 | 20 | 5 |
| 2018 | 41 | 12 | 13.77 | 24 | 8  | 2020 | 41 | 15 | 10.77 | 20 | 6 |
| 2018 | 42 | 13 | 13.93 | 24 | 8  | 2020 | 42 | 8  | 10.61 | 20 | 6 |
| 2018 | 43 | 7  | 13.94 | 24 | 8  | 2020 | 43 | 8  | 10.44 | 20 | 5 |
| 2018 | 44 | 13 | 13.97 | 24 | 8  | 2020 | 44 | 12 | 10.30 | 20 | 5 |
| 2018 | 45 | 19 | 13.81 | 24 | 8  | 2020 | 45 | 16 | 10.35 | 20 | 5 |
| 2018 | 46 | 15 | 14.29 | 25 | 8  | 2020 | 46 | 10 | 10.88 | 20 | 6 |
| 2018 | 47 | 13 | 14.77 | 26 | 9  | 2020 | 47 | 7  | 11.34 | 21 | 6 |
| 2018 | 48 | 10 | 15.90 | 27 | 10 | 2020 | 48 | 14 | 10.88 | 20 | 6 |
| 2018 | 49 | 11 | 14.68 | 25 | 9  | 2020 | 49 | 12 | 9.85  | 19 | 5 |
| 2018 | 50 | 24 | 13.75 | 24 | 8  | 2020 | 50 | 11 | 9.68  | 19 | 5 |
| 2018 | 51 | 12 | 13.96 | 25 | 8  | 2020 | 51 | 11 | 9.43  | 18 | 5 |
| 2018 | 52 | 12 | 13.61 | 24 | 8  | 2020 | 52 | 2  | 8.99  | 18 | 4 |
| 2018 | 53 | 1  | 13.07 | 23 | 8  | 2021 | 1  | 2  | 8.61  | 17 | 4 |
| 2019 | 1  | 3  | 12.55 | 22 | 7  | 2021 | 2  | 6  | 8.37  | 17 | 4 |
| 2019 | 2  | 8  | 12.35 | 22 | 7  | 2021 | 3  | 12 | 8.17  | 16 | 4 |
| 2019 | 3  | 15 | 12.93 | 23 | 8  | 2021 | 4  | 8  | 9.15  | 18 | 4 |
| 2019 | 4  | 15 | 13.83 | 24 | 8  | 2021 | 5  | 7  | 9.29  | 18 | 5 |
| 2019 | 5  | 11 | 14.32 | 24 | 9  | 2021 | 6  | 9  | 9.61  | 18 | 5 |
| 2019 | 6  | 16 | 15.24 | 26 | 9  | 2021 | 7  | 3  | 9.65  | 18 | 5 |
| 2019 | 7  | 13 | 14.92 | 25 | 9  | 2021 | 8  | 3  | 9.45  | 18 | 5 |
| 2019 | 8  | 6  | 14.82 | 25 | 9  | 2021 | 9  | 4  | 9.38  | 18 | 5 |
| 2019 | 9  | 8  | 14.12 | 24 | 9  | 2021 | 10 | 13 | 9.52  | 18 | 5 |
| 2019 | 10 | 15 | 14.30 | 25 | 9  | 2021 | 11 | 15 | 9.53  | 18 | 5 |
| 2019 | 11 | 18 | 14.26 | 25 | 9  | 2021 | 12 | 16 | 9.64  | 18 | 5 |
| 2019 | 12 | 21 | 13.89 | 24 | 8  | 2021 | 13 | 12 | 9.22  | 18 | 4 |
| 2019 | 13 | 14 | 13.03 | 23 | 8  | 2021 | 14 | 7  | 8.20  | 17 | 4 |
| 2019 | 14 | 17 | 11.77 | 21 | 7  | 2021 | 15 | 9  | 8.10  | 16 | 4 |
| 2019 | 15 | 12 | 12.09 | 21 | 7  | 2021 | 16 | 13 | 8.27  | 16 | 4 |
| 2019 | 16 | 7  | 13.09 | 23 | 8  | 2021 | 17 | 7  | 8.30  | 16 | 4 |
| 2019 | 17 | 5  | 13.09 | 23 | 8  | 2021 | 18 | 4  | 8.60  | 17 | 4 |
| 2019 | 18 | 8  | 13.54 | 24 | 8  | 2021 | 19 | 9  | 8.93  | 18 | 4 |
| 2019 | 19 | 7  | 14.07 | 24 | 8  | 2021 | 20 | 13 | 9.55  | 19 | 5 |
| 2019 | 20 | 10 | 14.58 | 25 | 9  | 2021 | 21 | 11 | 10.36 | 19 | 5 |

|      |    |    |       |    |    |      |    |    |       |    |   |
|------|----|----|-------|----|----|------|----|----|-------|----|---|
| 2019 | 21 | 16 | 16.47 | 27 | 11 | 2021 | 22 | 13 | 10.80 | 20 | 6 |
| 2019 | 22 | 10 | 16.69 | 28 | 11 | 2021 | 23 | 13 | 10.60 | 20 | 6 |
| 2019 | 23 | 21 | 16.44 | 27 | 10 | 2021 | 24 | 7  | 10.79 | 20 | 6 |
| 2019 | 24 | 13 | 16.72 | 28 | 11 | 2021 | 25 | 12 | 10.09 | 19 | 5 |
| 2019 | 25 | 17 | 15.54 | 26 | 10 | 2021 | 26 | 10 | 10.28 | 19 | 5 |
| 2019 | 26 | 12 | 15.23 | 26 | 9  | 2021 | 27 | 10 | 9.97  | 19 | 5 |
| 2019 | 27 | 10 | 15.15 | 26 | 9  | 2021 | 28 | 17 | 9.93  | 19 | 5 |
| 2019 | 28 | 8  | 14.87 | 26 | 9  | 2021 | 29 | 6  | 9.62  | 18 | 5 |
| 2019 | 29 | 16 | 14.52 | 25 | 9  | 2021 | 30 | 14 | 9.68  | 19 | 5 |
| 2019 | 30 | 19 | 14.66 | 25 | 9  | 2021 | 31 | 10 | 9.37  | 18 | 5 |
| 2019 | 31 | 18 | 14.81 | 25 | 9  | 2021 | 32 | 2  | 9.41  | 18 | 5 |
| 2019 | 32 | 9  | 15.20 | 26 | 9  | 2021 | 33 | 6  | 9.16  | 17 | 5 |
| 2019 | 33 | 8  | 15.12 | 26 | 9  | 2021 | 34 | 14 | 8.81  | 17 | 4 |
| 2019 | 34 | 9  | 14.54 | 25 | 9  | 2021 | 35 | 8  | 8.54  | 17 | 4 |
| 2019 | 35 | 10 | 14.38 | 25 | 9  | 2021 | 36 | 6  | 8.48  | 17 | 4 |
| 2019 | 36 | 12 | 13.99 | 24 | 8  | 2021 | 37 | 7  | 8.46  | 16 | 4 |
| 2019 | 37 | 12 | 13.65 | 24 | 8  | 2021 | 38 | 5  | 9.00  | 17 | 4 |
| 2019 | 38 | 13 | 13.94 | 24 | 8  | 2021 | 39 | 16 | 9.01  | 18 | 4 |
| 2019 | 39 | 10 | 13.95 | 25 | 8  | 2021 | 40 | 14 | 8.79  | 17 | 4 |
| 2019 | 40 | 7  | 13.09 | 23 | 8  | 2021 | 41 | 8  | 8.83  | 17 | 4 |
| 2019 | 41 | 10 | 13.63 | 24 | 8  | 2021 | 42 | 7  | 8.99  | 17 | 4 |
| 2019 | 42 | 12 | 13.72 | 24 | 8  | 2021 | 43 | 11 | 8.99  | 17 | 4 |
| 2019 | 43 | 13 | 13.42 | 24 | 8  | 2021 | 44 | 14 | 8.61  | 17 | 4 |
| 2019 | 44 | 15 | 13.20 | 24 | 8  | 2021 | 45 | 10 | 8.75  | 17 | 4 |
| 2019 | 45 | 11 | 13.34 | 24 | 8  | 2021 | 46 | 15 | 9.18  | 18 | 4 |
| 2019 | 46 | 15 | 13.92 | 24 | 8  | 2021 | 47 | 12 | 9.51  | 18 | 5 |
| 2019 | 47 | 11 | 14.43 | 25 | 9  | 2021 | 48 | 11 | 9.20  | 18 | 5 |
| 2019 | 48 | 17 | 13.43 | 24 | 8  | 2021 | 49 | 8  | 8.07  | 16 | 4 |
| 2019 | 49 | 14 | 12.28 | 22 | 7  | 2021 | 50 | 12 | 7.59  | 16 | 3 |
| 2019 | 50 | 16 | 12.37 | 23 | 7  | 2021 | 51 | 14 | 7.49  | 15 | 3 |
| 2019 | 51 | 20 | 11.93 | 22 | 7  | 2021 | 52 | 12 | 7.0   | 14 | 3 |
| 2019 | 52 | 1  | 11.70 | 21 |    |      |    |    |       |    |   |

196

197 PI = prediction interval

198



199 **eTable 9.** Observed and expected number of syphilis diagnoses with 95% prediction  
 200 intervals, 2018-2021. Parameters:  $b = 5$  and  $w = 3$ .  
 201

| Year | Week | Observed | Predicted | 95% PI upper bound | 95% PI lower bound | Year | Week | Observed | Predicted | 95% PI upper bound | 95% PI lower bound |
|------|------|----------|-----------|--------------------|--------------------|------|------|----------|-----------|--------------------|--------------------|
| 2018 | 1    | 21       | 85.90     | 120                | 71                 | 2020 | 1    | 66       | 87.08     | 131                | 65                 |
| 2018 | 2    | 59       | 86.44     | 121                | 71                 | 2020 | 2    | 75       | 84.36     | 127                | 63                 |
| 2018 | 3    | 93       | 84.04     | 117                | 70                 | 2020 | 3    | 72       | 86.15     | 129                | 65                 |
| 2018 | 4    | 73       | 91.38     | 127                | 76                 | 2020 | 4    | 88       | 95.85     | 141                | 74                 |
| 2018 | 5    | 71       | 97.00     | 132                | 82                 | 2020 | 5    | 57       | 101.20    | 149                | 78                 |
| 2018 | 6    | 59       | 100.67    | 138                | 85                 | 2020 | 6    | 51       | 102.12    | 150                | 79                 |
| 2018 | 7    | 61       | 101.82    | 140                | 85                 | 2020 | 7    | 53       | 98.90     | 146                | 76                 |
| 2018 | 8    | 69       | 95.90     | 133                | 80                 | 2020 | 8    | 45       | 99.00     | 146                | 76                 |
| 2018 | 9    | 93       | 97.47     | 135                | 81                 | 2020 | 9    | 49       | 101.12    | 147                | 78                 |
| 2018 | 10   | 80       | 101.06    | 138                | 85                 | 2020 | 10   | 60       | 100.86    | 148                | 77                 |
| 2018 | 11   | 78       | 102.13    | 141                | 86                 | 2020 | 11   | 44       | 99.38     | 146                | 76                 |
| 2018 | 12   | 71       | 101.66    | 140                | 85                 | 2020 | 12   | 58       | 96.17     | 142                | 73                 |
| 2018 | 13   | 67       | 100.84    | 139                | 84                 | 2020 | 13   | 35       | 93.82     | 139                | 71                 |
| 2018 | 14   | 71       | 100.48    | 138                | 84                 | 2020 | 14   | 47       | 86.51     | 128                | 65                 |
| 2018 | 15   | 89       | 98.55     | 136                | 82                 | 2020 | 15   | 45       | 89.65     | 134                | 68                 |
| 2018 | 16   | 79       | 105.42    | 145                | 88                 | 2020 | 16   | 50       | 91.66     | 137                | 69                 |
| 2018 | 17   | 68       | 110.34    | 151                | 93                 | 2020 | 17   | 39       | 92.93     | 138                | 70                 |
| 2018 | 18   | 29       | 111.93    | 153                | 94                 | 2020 | 18   | 21       | 95.48     | 141                | 73                 |
| 2018 | 19   | 80       | 116.74    | 159                | 99                 | 2020 | 19   | 75       | 95.67     | 142                | 72                 |
| 2018 | 20   | 93       | 117.34    | 160                | 99                 | 2020 | 20   | 68       | 98.37     | 145                | 75                 |
| 2018 | 21   | 75       | 121.55    | 165                | 103                | 2020 | 21   | 75       | 108.92    | 157                | 85                 |
| 2018 | 22   | 86       | 131.94    | 176                | 113                | 2020 | 22   | 78       | 111.11    | 160                | 87                 |
| 2018 | 23   | 95       | 134.02    | 179                | 115                | 2020 | 23   | 66       | 110.34    | 158                | 86                 |
| 2018 | 24   | 85       | 131.47    | 176                | 112                | 2020 | 24   | 97       | 108.82    | 157                | 85                 |
| 2018 | 25   | 103      | 129.32    | 174                | 110                | 2020 | 25   | 72       | 102.44    | 149                | 79                 |
| 2018 | 26   | 98       | 123.56    | 168                | 105                | 2020 | 26   | 76       | 101.36    | 147                | 78                 |
| 2018 | 27   | 106      | 125.25    | 169                | 107                | 2020 | 27   | 64       | 97.08     | 144                | 73                 |
| 2018 | 28   | 87       | 122.15    | 167                | 103                | 2020 | 28   | 55       | 93.02     | 139                | 70                 |
| 2018 | 29   | 70       | 116.53    | 161                | 97                 | 2020 | 29   | 33       | 86.88     | 130                | 65                 |
| 2018 | 30   | 81       | 111.27    | 154                | 93                 | 2020 | 30   | 64       | 87.62     | 131                | 65                 |
| 2018 | 31   | 88       | 114.75    | 158                | 96                 | 2020 | 31   | 36       | 90.29     | 133                | 68                 |
| 2018 | 32   | 89       | 119.22    | 163                | 100                | 2020 | 32   | 45       | 93.78     | 139                | 71                 |
| 2018 | 33   | 66       | 123.87    | 170                | 104                | 2020 | 33   | 56       | 92.20     | 137                | 69                 |
| 2018 | 34   | 94       | 120.76    | 167                | 101                | 2020 | 34   | 45       | 88.42     | 132                | 66                 |

|      |    |     |        |     |     |      |    |     |       |     |    |
|------|----|-----|--------|-----|-----|------|----|-----|-------|-----|----|
| 2018 | 35 | 82  | 116.82 | 162 | 97  | 2020 | 35 | 67  | 90.12 | 134 | 67 |
| 2018 | 36 | 91  | 122.58 | 168 | 103 | 2020 | 36 | 58  | 91.52 | 135 | 69 |
| 2018 | 37 | 81  | 122.01 | 167 | 103 | 2020 | 37 | 58  | 86.69 | 131 | 64 |
| 2018 | 38 | 62  | 115.73 | 161 | 96  | 2020 | 38 | 45  | 84.05 | 128 | 61 |
| 2018 | 39 | 88  | 113.62 | 158 | 94  | 2020 | 39 | 68  | 81.47 | 124 | 59 |
| 2018 | 40 | 81  | 110.46 | 154 | 91  | 2020 | 40 | 66  | 78.55 | 121 | 57 |
| 2018 | 41 | 74  | 107.31 | 150 | 89  | 2020 | 41 | 67  | 80.98 | 123 | 59 |
| 2018 | 42 | 96  | 112.72 | 156 | 94  | 2020 | 42 | 61  | 79.15 | 122 | 57 |
| 2018 | 43 | 84  | 109.30 | 153 | 90  | 2020 | 43 | 62  | 77.48 | 120 | 56 |
| 2018 | 44 | 76  | 108.33 | 153 | 89  | 2020 | 44 | 58  | 79.56 | 122 | 57 |
| 2018 | 45 | 97  | 110.49 | 156 | 90  | 2020 | 45 | 60  | 78.01 | 121 | 56 |
| 2018 | 46 | 87  | 109.87 | 156 | 90  | 2020 | 46 | 65  | 78.81 | 121 | 57 |
| 2018 | 47 | 77  | 109.85 | 155 | 90  | 2020 | 47 | 64  | 79.19 | 122 | 57 |
| 2018 | 48 | 98  | 113.22 | 160 | 92  | 2020 | 48 | 74  | 76.45 | 119 | 54 |
| 2018 | 49 | 79  | 106.30 | 153 | 86  | 2020 | 49 | 63  | 67.91 | 107 | 47 |
| 2018 | 50 | 97  | 99.23  | 143 | 80  | 2020 | 50 | 49  | 66.61 | 106 | 46 |
| 2018 | 51 | 79  | 99.72  | 144 | 80  | 2020 | 51 | 65  | 65.08 | 103 | 45 |
| 2018 | 52 | 64  | 99.66  | 143 | 80  | 2020 | 52 | 19  | 65.27 | 103 | 45 |
| 2018 | 53 | 6   | 101.55 | 146 | 81  | 2021 | 1  | 32  | 64.09 | 102 | 44 |
| 2019 | 1  | 58  | 101.33 | 146 | 81  | 2021 | 2  | 47  | 62.61 | 100 | 43 |
| 2019 | 2  | 61  | 98.61  | 142 | 79  | 2021 | 3  | 83  | 62.15 | 99  | 43 |
| 2019 | 3  | 86  | 102.87 | 147 | 83  | 2021 | 4  | 68  | 69.42 | 108 | 49 |
| 2019 | 4  | 62  | 110.43 | 156 | 90  | 2021 | 5  | 68  | 72.20 | 112 | 51 |
| 2019 | 5  | 66  | 115.71 | 163 | 94  | 2021 | 6  | 60  | 71.38 | 112 | 50 |
| 2019 | 6  | 69  | 115.62 | 164 | 94  | 2021 | 7  | 74  | 69.44 | 109 | 48 |
| 2019 | 7  | 94  | 110.53 | 157 | 89  | 2021 | 8  | 56  | 67.74 | 107 | 47 |
| 2019 | 8  | 102 | 111.21 | 158 | 90  | 2021 | 9  | 92  | 68.11 | 107 | 47 |
| 2019 | 9  | 88  | 113.25 | 159 | 92  | 2021 | 10 | 82  | 67.00 | 106 | 46 |
| 2019 | 10 | 92  | 114.13 | 162 | 93  | 2021 | 11 | 104 | 65.78 | 105 | 45 |
| 2019 | 11 | 62  | 114.86 | 163 | 93  | 2021 | 12 | 85  | 63.88 | 102 | 43 |
| 2019 | 12 | 80  | 112.07 | 159 | 91  | 2021 | 13 | 70  | 62.84 | 101 | 43 |
| 2019 | 13 | 64  | 110.62 | 157 | 89  | 2021 | 14 | 68  | 57.17 | 92  | 38 |
| 2019 | 14 | 70  | 105.33 | 150 | 85  | 2021 | 15 | 82  | 58.71 | 95  | 39 |
| 2019 | 15 | 85  | 110.77 | 157 | 89  | 2021 | 16 | 71  | 60.62 | 98  | 41 |
| 2019 | 16 | 71  | 116.20 | 164 | 94  | 2021 | 17 | 55  | 62.80 | 100 | 43 |
| 2019 | 17 | 13  | 117.52 | 165 | 96  | 2021 | 18 | 46  | 65.28 | 103 | 45 |
| 2019 | 18 | 60  | 121.21 | 170 | 99  | 2021 | 19 | 81  | 66.91 | 106 | 46 |
| 2019 | 19 | 69  | 122.36 | 171 | 100 | 2021 | 20 | 95  | 68.68 | 109 | 47 |
| 2019 | 20 | 78  | 126.40 | 176 | 104 | 2021 | 21 | 59  | 76.33 | 117 | 55 |

|      |    |     |        |     |     |      |    |     |       |     |    |
|------|----|-----|--------|-----|-----|------|----|-----|-------|-----|----|
| 2019 | 21 | 91  | 138.46 | 189 | 115 | 2021 | 22 | 98  | 79.46 | 121 | 57 |
| 2019 | 22 | 103 | 140.78 | 192 | 117 | 2021 | 23 | 87  | 79.35 | 120 | 57 |
| 2019 | 23 | 92  | 139.35 | 190 | 116 | 2021 | 24 | 98  | 78.40 | 119 | 57 |
| 2019 | 24 | 82  | 138.20 | 189 | 115 | 2021 | 25 | 107 | 74.12 | 115 | 52 |
| 2019 | 25 | 97  | 132.26 | 182 | 109 | 2021 | 26 | 73  | 72.02 | 111 | 51 |
| 2019 | 26 | 78  | 131.85 | 181 | 109 | 2021 | 27 | 109 | 69.90 | 109 | 49 |
| 2019 | 27 | 70  | 128.08 | 180 | 104 | 2021 | 28 | 107 | 65.50 | 104 | 45 |
| 2019 | 28 | 52  | 121.87 | 173 | 98  | 2021 | 29 | 78  | 60.53 | 97  | 41 |
| 2019 | 29 | 85  | 115.03 | 165 | 92  | 2021 | 30 | 106 | 60.22 | 96  | 41 |
| 2019 | 30 | 62  | 116.32 | 166 | 93  | 2021 | 31 | 78  | 61.30 | 97  | 42 |
| 2019 | 31 | 69  | 118.23 | 167 | 95  | 2021 | 32 | 74  | 63.79 | 101 | 44 |
| 2019 | 32 | 48  | 123.22 | 175 | 99  | 2021 | 33 | 98  | 64.03 | 102 | 44 |
| 2019 | 33 | 90  | 120.56 | 172 | 97  | 2021 | 34 | 81  | 62.22 | 99  | 42 |
| 2019 | 34 | 99  | 115.97 | 166 | 92  | 2021 | 35 | 102 | 63.90 | 101 | 44 |
| 2019 | 35 | 73  | 120.12 | 170 | 97  | 2021 | 36 | 115 | 66.68 | 103 | 47 |
| 2019 | 36 | 81  | 120.45 | 170 | 97  | 2021 | 37 | 109 | 64.93 | 102 | 45 |
| 2019 | 37 | 59  | 114.41 | 165 | 91  | 2021 | 38 | 66  | 64.64 | 103 | 44 |
| 2019 | 38 | 71  | 112.71 | 163 | 89  | 2021 | 39 | 124 | 63.34 | 101 | 43 |
| 2019 | 39 | 86  | 109.57 | 158 | 87  | 2021 | 40 | 113 | 62.21 | 99  | 42 |
| 2019 | 40 | 54  | 106.07 | 153 | 84  | 2021 | 41 | 109 | 64.29 | 100 | 45 |
| 2019 | 41 | 65  | 111.20 | 159 | 89  | 2021 | 42 | 128 | 64.37 | 102 | 44 |
| 2019 | 42 | 59  | 108.65 | 157 | 86  | 2021 | 43 | 130 | 63.37 | 101 | 43 |
| 2019 | 43 | 74  | 106.95 | 155 | 84  | 2021 | 44 | 105 | 64.98 | 103 | 44 |
| 2019 | 44 | 50  | 108.85 | 159 | 85  | 2021 | 45 | 128 | 64.65 | 102 | 44 |
| 2019 | 45 | 76  | 106.73 | 157 | 83  | 2021 | 46 | 119 | 65.41 | 102 | 45 |
| 2019 | 46 | 77  | 106.87 | 156 | 83  | 2021 | 47 | 91  | 65.73 | 104 | 45 |
| 2019 | 47 | 80  | 108.96 | 160 | 85  | 2021 | 48 | 121 | 64.34 | 103 | 44 |
| 2019 | 48 | 72  | 102.45 | 152 | 79  | 2021 | 49 | 115 | 57.14 | 93  | 38 |
| 2019 | 49 | 70  | 92.73  | 139 | 70  | 2021 | 50 | 138 | 55.42 | 91  | 36 |
| 2019 | 50 | 65  | 91.64  | 137 | 69  | 2021 | 51 | 169 | 54.11 | 88  | 36 |
| 2019 | 51 | 75  | 88.92  | 133 | 67  | 2021 | 52 | 68  | 54.87 | 90  | 36 |
| 2019 | 52 | 5   | 89.97  | 135 | 68  |      |    |     |       |     |    |

202

203 PI = prediction interval

204 **eFigure 1.** Observed and expected number of chlamydia, gonorrhoea, condyloma, and  
 205 herpes diagnoses per sentinel institution with 95% prediction intervals, 2018-2021,  
 206 women only. Parameters:  $b = 5$  and  $w = 1$ .  
 207  
 208

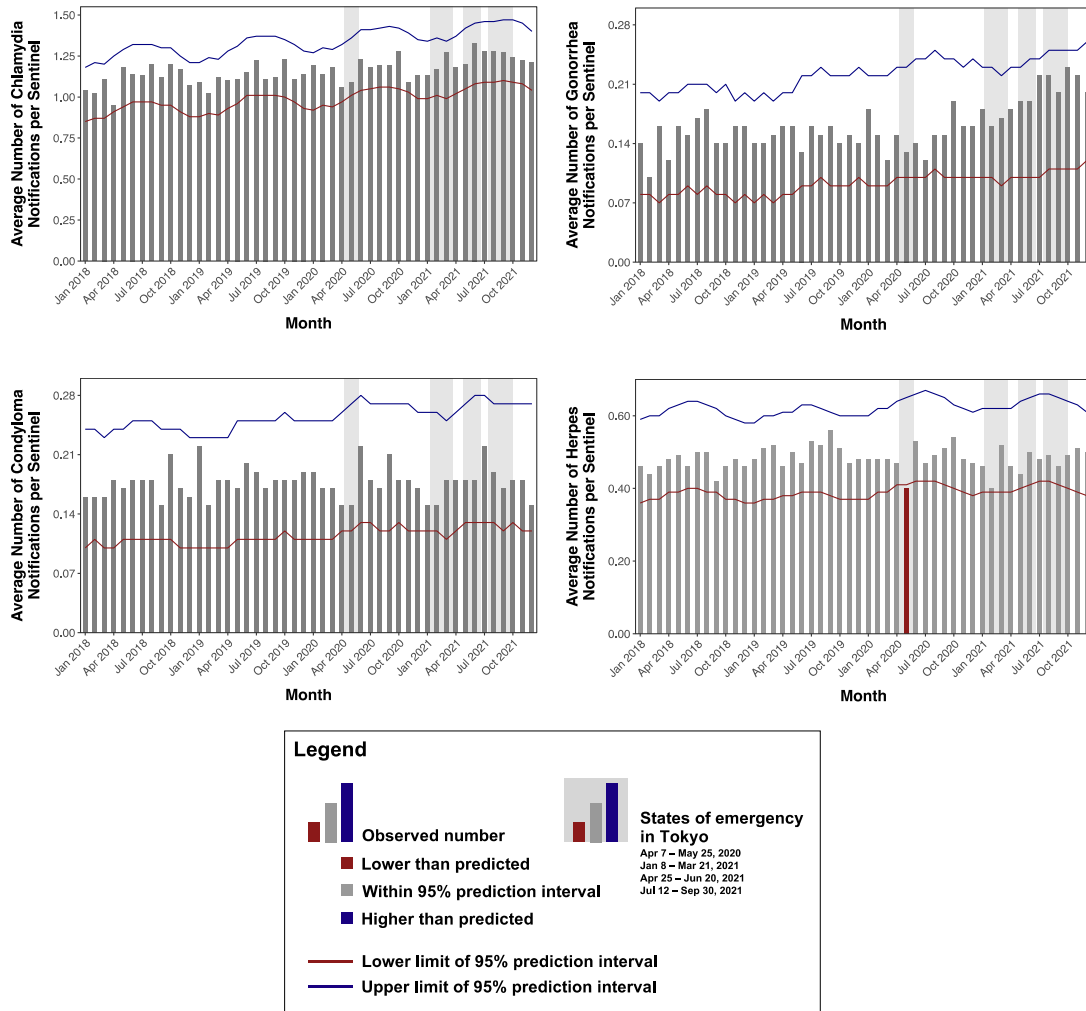

209 **eFigure 2.** Observed and expected number of chlamydia, gonorrhoea, condyloma, and  
 210 herpes diagnoses per sentinel institution with 95% prediction intervals, 2018-2021, men  
 211 only. Parameters:  $b = 5$  and  $w = 1$ .  
 212  
 213  
 214

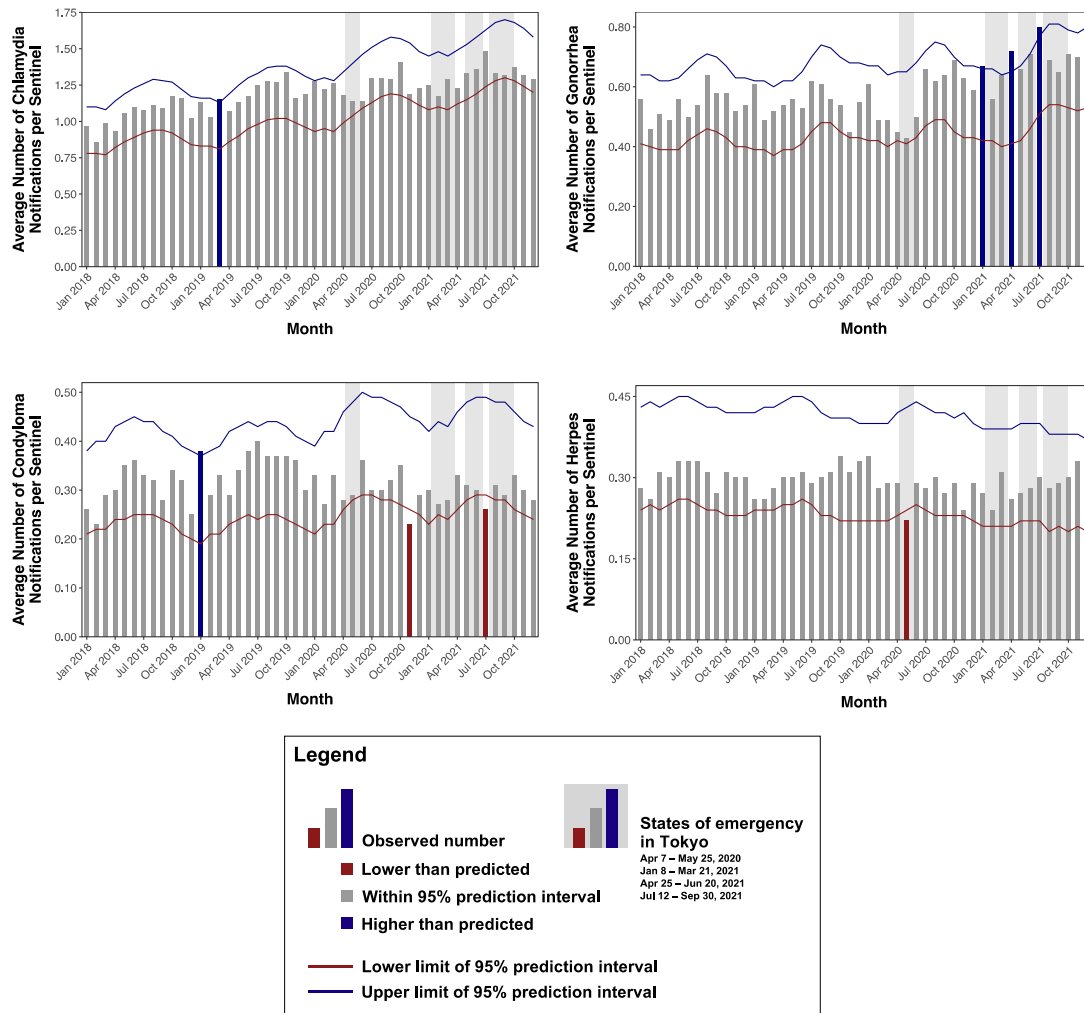

215 **eFigure 3.** Observed and expected number of HIV/AIDS diagnoses with 95% prediction  
 216 intervals, 2018-2021, stratified by sex of sexual partners. Parameters:  $b = 5$  and  $w = 3$ .  
 217  
 218

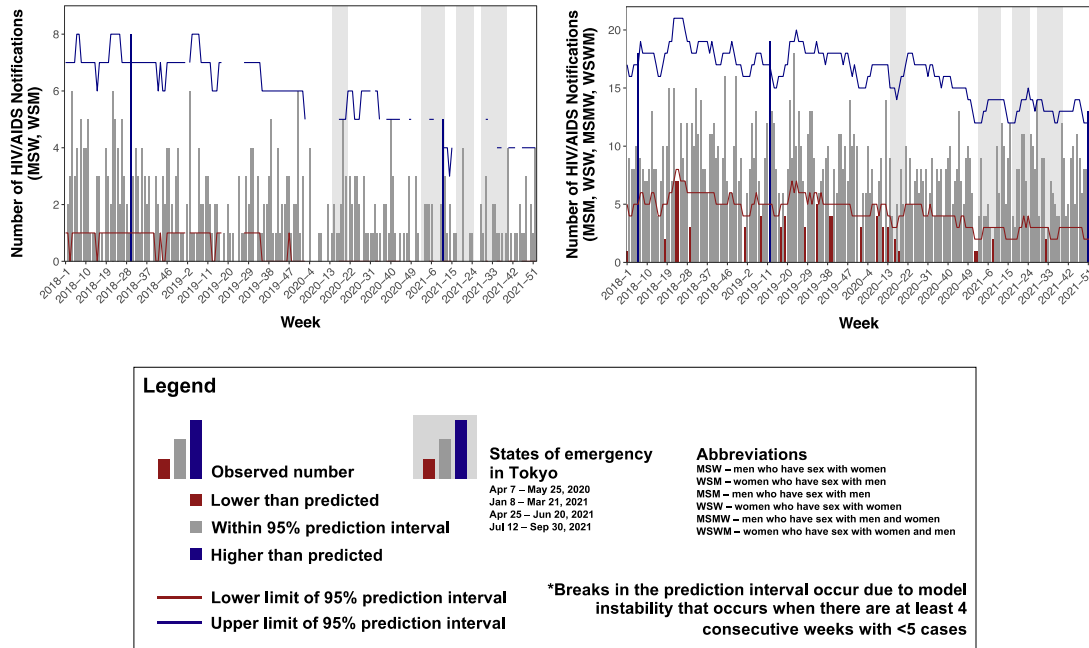

219 **eFigure 4.** Observed and expected number of syphilis diagnoses with 95% prediction  
 220 intervals, 2018-2021, stratified by stage at diagnosis. Parameters:  $b = 5$  and  $w = 3$ .  
 221  
 222

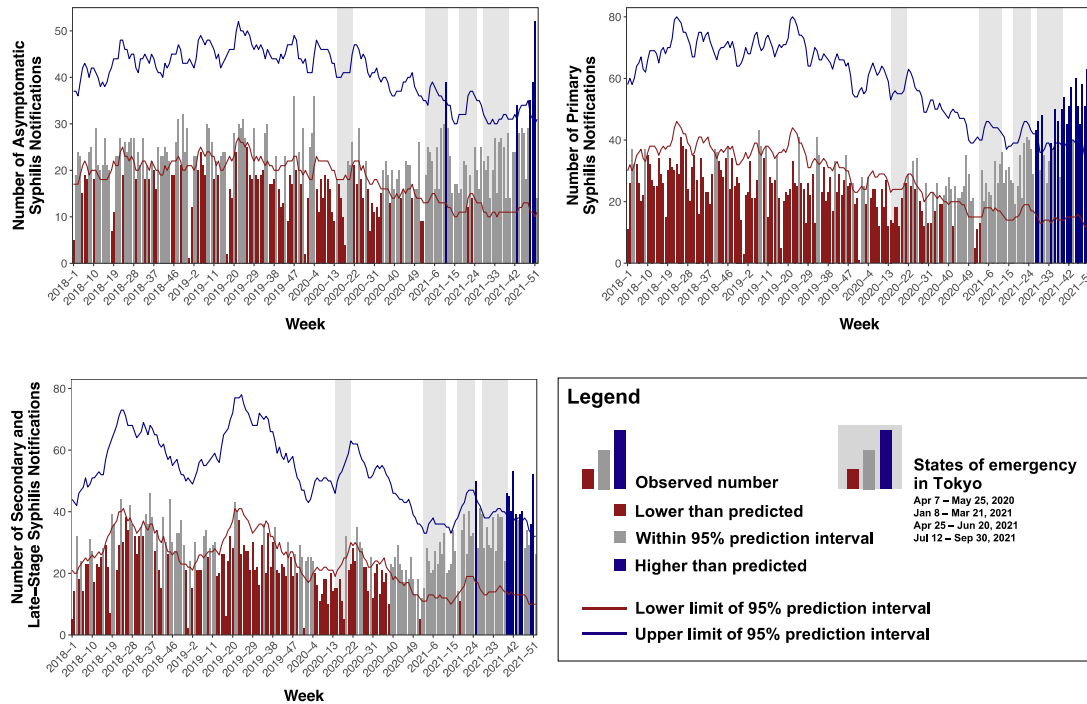

223 **References**

224

- 225 1. Infectious Disease Surveillance Center. *The National Epidemiological Surveillance of*  
226 *Infectious Diseases in compliance with the enforcement of the new Infectious Diseases Control*  
227 *Law*. Vol. 20(4). 1999. <http://idsc.nih.go.jp/iasr/20/230/de2309.html>
- 228 2. Kawado M, Hashimoto S, Ohta A, et al. Estimating nationwide cases of sexually  
229 transmitted diseases in 2015 from sentinel surveillance data in Japan. *BMC Infect Dis*. Jan 28  
230 2020;20(1):77. doi:10.1186/s12879-020-4801-x
- 231 3. National Institute for Infectious Disease. *Implementation Manual for the National*  
232 *Epidemiological Surveillance of Infectious Diseases Program*.  
233 <https://www.mhlw.go.jp/content/10900000/000488981.pdf>
- 234 4. National Institute for Infectious Disease. *Syphilis, Japan*. Vol. 41. 2020. *Infectious Agents*  
235 *Surveillance Report*. <https://www.niid.go.jp/niid/en/a-h7n9-en/865-iasr/9542-479te.html>
- 236 5. National Institute for Infectious Disease. *Reporting Criteria of Acquired*  
237 *immunodeficiency syndrome Infectious Agents Surveillance Report*.  
238 <https://www.niid.go.jp/niid/images/iasr/34/403/de4031.pdf>
- 239 6. Ministry of Health Labour and Welfare. *Genital Chlamydia [Seiki kuramijia kansenshou,*  
240 *in Japanese]*. <https://www.mhlw.go.jp/bunya/kenkou/kekkaku-kansenshou11/01-05-31.html>
- 241 7. Ministry of Health Labour and Welfare. *Gonorrhoea [Rinkin kansenshou, in Japanese]*.  
242 <https://www.mhlw.go.jp/bunya/kenkou/kekkaku-kansenshou11/01-05-34.html>
- 243 8. Ministry of Health Labour and Welfare. *Condyloma Acuminata [Seikei konjirooma, in*  
244 *Japanese]*. <https://www.mhlw.go.jp/bunya/kenkou/kekkaku-kansenshou11/01-05-33.html>
- 245 9. Ministry of Health Labour and Welfare. *Genital Herpes [Seiki herupesu uirusu*  
246 *kansenshou, in Japanese]*. [https://www.mhlw.go.jp/bunya/kenkou/kekkaku-kansenshou11/01-](https://www.mhlw.go.jp/bunya/kenkou/kekkaku-kansenshou11/01-05-32.html)  
247 [05-32.html](https://www.mhlw.go.jp/bunya/kenkou/kekkaku-kansenshou11/01-05-32.html)
- 248 10. Yoneoka D, Kawashima T, Makiyama K, Tanoue Y, Nomura S, Eguchi A. Geographically  
249 weighted generalized Farrington algorithm for rapid outbreak detection over short data  
250 accumulation periods. *Stat Med*. Dec 10 2021;40(28):6277-6294. doi:10.1002/sim.9182
- 251 11. Noufaily A, Enki DG, Farrington P, Garthwaite P, Andrews N, Charlett A. An improved  
252 algorithm for outbreak detection in multiple surveillance systems. *Stat Med*. Mar 30  
253 2013;32(7):1206-22. doi:10.1002/sim.5595
- 254 12. Farrington CP, Andrews NJ, Beale AD, Catchpole MA. A statistical algorithm for the early  
255 detection of outbreaks of infectious disease. *J Roy Stat Soc a Sta*. 1996;159:547-563. doi:Doi  
256 10.2307/2983331  
257
