# Supplementary material for: Recent changes in the reporting of STIs in Japan during the COVID-19 pandemic
Source: HighWire-hosted journal article supplement (doi:10.1136/sextrans-2021-055378), 2022-04-22
Supplement: sextrans-2021-055378supp002_data_supplement.pdf [file sextrans-2021-055378supp002_data_supplement.pdf]

## 新型コロナウイルス感染症流行下の日本における性感染症報告数の推移について

### 抄録

#### 目的

新型コロナウイルスの流行は世界中の性感染症報告数に影響を及ぼしている。本研究はコロナ禍とそれ以前の日本における性感染症報告数の推移を分析することを目的とした。

#### 方法

国立感染症研究所が公開する2013年1月から2021年12月までの感染症動向調査データを用い、コロナ禍（2020年1月以降）とそれ以前における性器クラミジア、淋病、尖形コンジローマ、および性器ヘルペスの月別の定点当たり報告数、およびHIV/AIDSと梅毒の週別の総報告数の推移を、準ポアソン回帰を用いて評価した。コロナ禍のある時点において、過去5年間の同時点を参照期間として推定される予測数を、実際の観測数と比較し、95%予測区間を上回った、もしくは下回った場合をそれぞれ超過、過少と定義した。

#### 結果

コロナ禍における性器クラミジアの定点当たり報告数には概ね超過・過少は見られなかった。淋病の定点当たり報告数は2021年の前半数ヶ月に超過が見られた。コロナ禍の尖形コンジローマ、性器ヘルペス、HIV/AIDSにおいては一時的な過少が散見されたが、超過は認められなかった。梅毒では2020年末まで過少が多く見られたが、その後逆転し2021年後半は超過が認められた。

#### 結論

日本の性感染症報告数の変化とコロナ禍の関連が認められた。報告数の超過がコロナ禍の後期に比較的多かった。これらの性感染症の推移はコロナ禍の性行動の変化や受診および検査数の減少に影響を受けている可能性がある。コロナ禍が性感染症に与える長期的な影響について今後さらなる研究が必要である。
